# Supplementary material for: Volatile Carbonyl Compounds Emission in Dry-Process Fibreboard: Identification through a Selective GDME-HPLC-DAD-MS/MS Method
Source: MDPI journal article supplement (doi:10.3390/separations11040092), 2024-03-25
Supplement: s1 [file s1]

To be submitted as an **Original Research Paper** to **Separations**

**Volatile carbonyl compounds emission in dry-process fibreboard: identification through a selective GDME-HPLC-DAD-MS/MS method**

Fátima Daniela Gonçalves<sup>1</sup>, Jorge M. Martins<sup>2,3,4</sup>, Luísa H. Carvalho<sup>2,3,4</sup>, José António Rodrigues<sup>1</sup>, Rui Miguel Ramos<sup>1\*</sup>

<sup>1</sup>LAQV-REQUIMTE - Departamento de Química e Bioquímica, Faculdade de Ciências, Universidade do Porto, Rua do Campo Alegre, s/n, 4169-007 Porto, Portugal

<sup>2</sup>DEMad - Departamento de Engenharia de Madeiras, Instituto Politécnico de Viseu, Campus Politécnico de Repeses, 3504-510 Viseu, Portugal

<sup>3</sup>LEPABE – Faculty of Engineering, University of Porto, Rua Dr. Roberto Frias, s/n, 4200-465 Porto, Portugal

<sup>4</sup>ALiCE – Associate Laboratory in Chemical Engineering, Faculty of Engineering, University of Porto, Rua Dr. Roberto Frias, 4200-465 Porto, Portugal

\* Corresponding Author:

Departamento de Química e Bioquímica, Faculdade de Ciências, Universidade do Porto

Rua do Campo Alegre, s/n, 4169-007 Porto, Portugal

(e-mail) rui.ramos@fc.up.pt

**Table S1** – Experimental matrix for the 2<sup>4</sup> full factorial design study.

| Run Order       | Temperature | Time | Volume | Concentration |
|-----------------|-------------|------|--------|---------------|
| 1               | 30          | 10   | 250    | 0.10          |
| 3               | 30          | 60   | 250    | 0.10          |
| 5               | 30          | 10   | 750    | 0.10          |
| 7               | 30          | 60   | 750    | 0.10          |
| 9               | 30          | 10   | 250    | 0.30          |
| 11              | 30          | 60   | 250    | 0.30          |
| 13              | 30          | 10   | 750    | 0.30          |
| 15              | 30          | 60   | 750    | 0.30          |
| 17 <sup>a</sup> | 45          | 35   | 500    | 0.20          |
| 18 <sup>a</sup> | 45          | 35   | 500    | 0.20          |
| 2               | 60          | 10   | 250    | 0.10          |
| 4               | 60          | 60   | 250    | 0.10          |
| 6               | 60          | 10   | 750    | 0.10          |
| 8               | 60          | 60   | 750    | 0.10          |
| 10              | 60          | 10   | 250    | 0.30          |
| 12              | 60          | 60   | 250    | 0.30          |
| 14              | 60          | 10   | 750    | 0.30          |
| 16              | 60          | 60   | 750    | 0.30          |

<sup>a</sup> Runs 17 and 18 correspond to the centre points.

**Table S2** – Real and coded matrices for the Box-Behnken design.

| Run Order       | Real matrix |      |        | Coded matrix |      |        |
|-----------------|-------------|------|--------|--------------|------|--------|
|                 | Temperature | Time | Volume | Temperature  | Time | Volume |
| 1               | 30          | 10   | 500    | -1           | -1   | 0      |
| 3               | 30          | 60   | 500    | -1           | +1   | 0      |
| 5               | 30          | 35   | 250    | -1           | 0    | -1     |
| 7               | 30          | 35   | 750    | -1           | 0    | +1     |
| 9               | 45          | 10   | 250    | 0            | -1   | -1     |
| 10              | 45          | 60   | 250    | 0            | +1   | -1     |
| 11              | 45          | 10   | 750    | 0            | -1   | +1     |
| 12              | 45          | 60   | 750    | 0            | +1   | +1     |
| 13 <sup>a</sup> | 45          | 35   | 500    | 0            | 0    | 0      |
| 14 <sup>a</sup> | 45          | 35   | 500    | 0            | 0    | 0      |
| 15              | 45          | 35   | 500    | 0            | 0    | 0      |
| 2               | 60          | 10   | 500    | +1           | -1   | 0      |
| 4               | 60          | 60   | 500    | +1           | +1   | 0      |
| 6               | 60          | 35   | 250    | +1           | 0    | -1     |
| 8               | 60          | 35   | 750    | +1           | 0    | +1     |

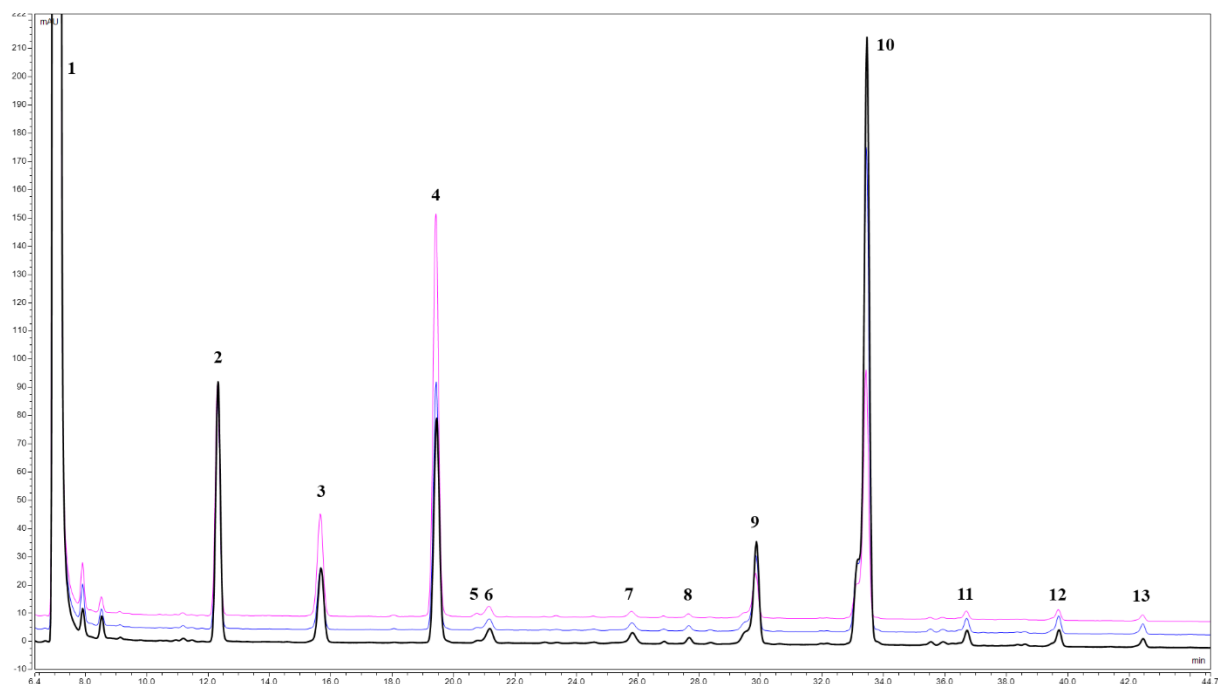

**Figure S1** – Representative chromatogram of orange MDF bonded with MUF resin with thicknesses of 12 mm (—), 16 mm (—) and 19 mm (—). Identified compounds as DNPH derivatives: 1 – DNPH; 2 – formaldehyde; 3 – acetaldehyde; 4 – acetone; 5 – furfural; 6 – propanal; 7 – butanal; 8 – benzaldehyde; 9 – pentanal; 10 – hexanal; 11 – heptanal; 12 – octanal; 13 – nonanal.

## Peak 8 MS<sup>2</sup>

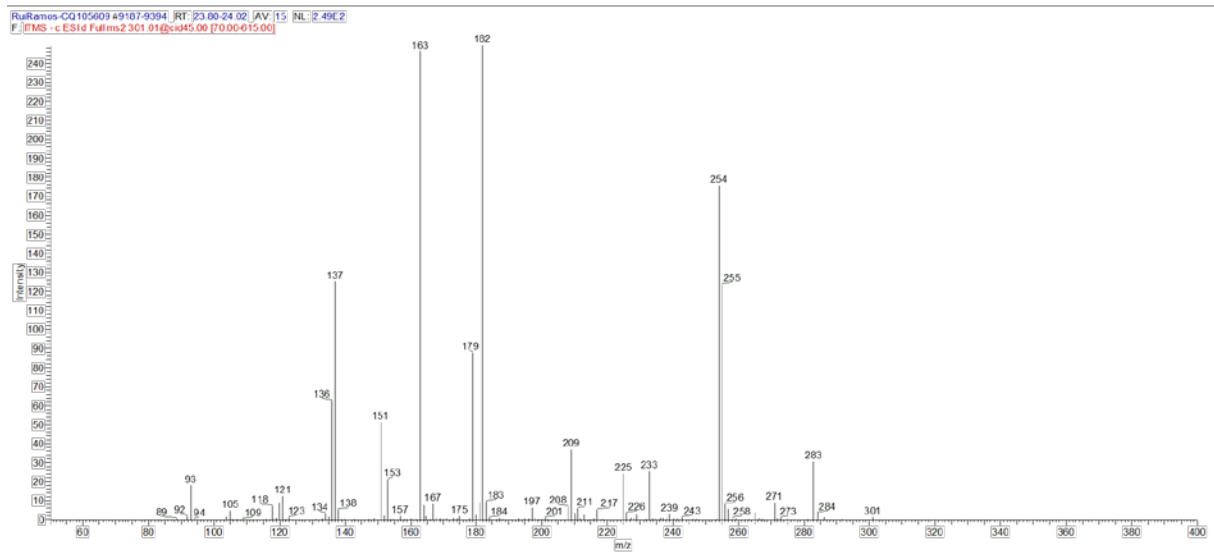

## Peak 13 MS<sup>2</sup>

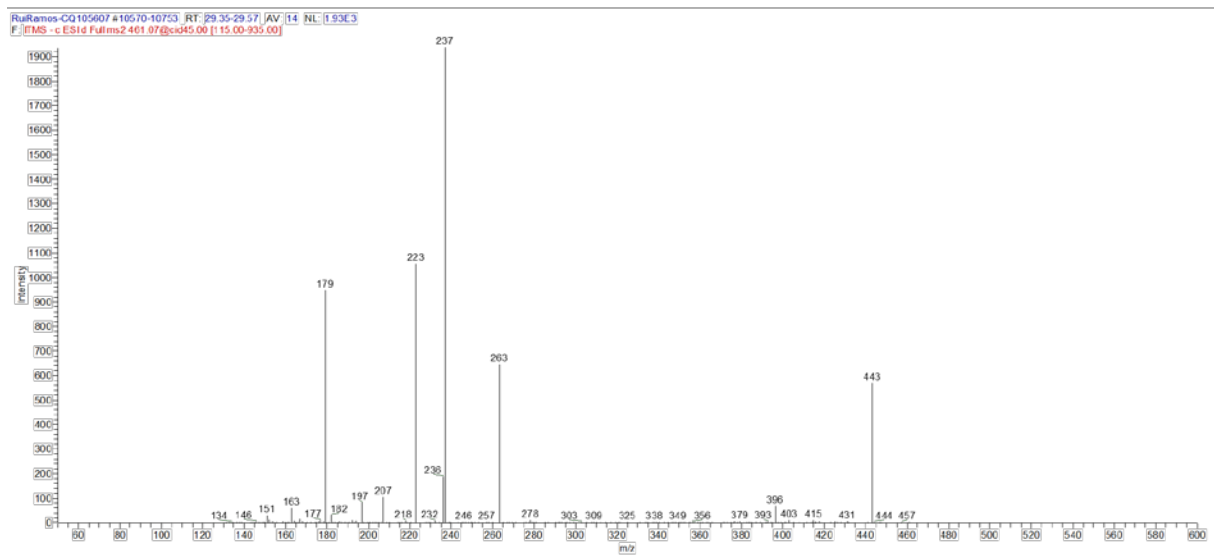

## Peak 20 MS<sup>2</sup>

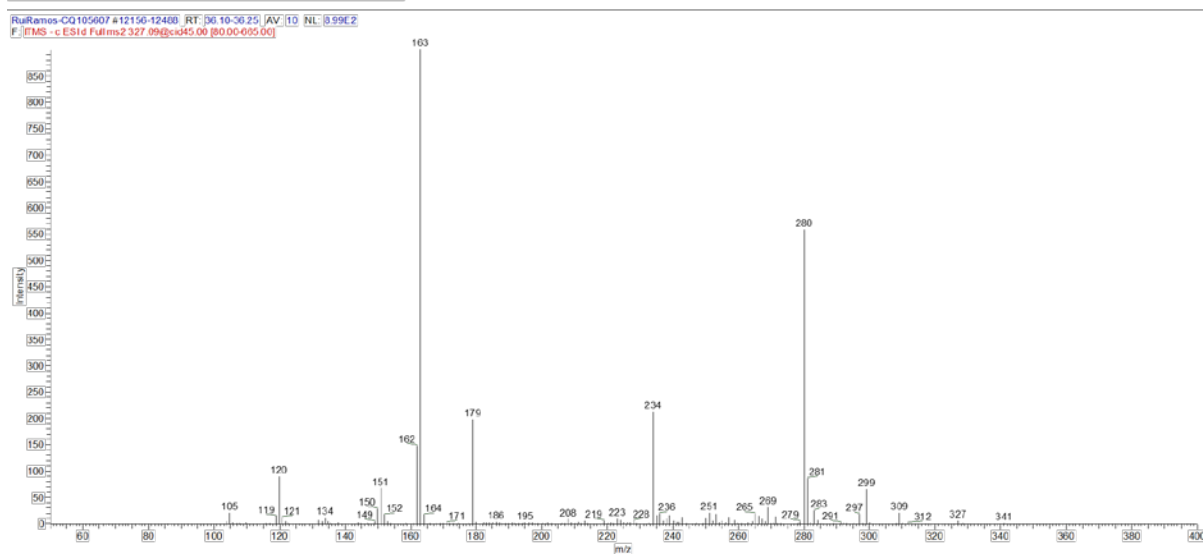

**Figure S2** – MS/MS spectrum for the  $[M - H]^-$  ion for Peaks 8, 13 and 20.
